# Supplementary material for: Short-Term Blockade of Pro-Inflammatory Alarmin S100A9 Favorably Modulates Left Ventricle Proteome and Related Signaling Pathways Involved in Post-Myocardial Infarction Recovery
Source: MDPI journal article supplement (doi:10.3390/ijms23095289), 2022-05-09
Supplement: s1 [file s1]

# Short-Term Blockade of Pro-Inflammatory Alarmin S100A9 Favorably Modulates Left Ventricle Proteome and Related Signaling Pathways Involved in Post-Myocardial Infarction Recovery

Raluca Maria Boteanu <sup>1</sup>, Viorel-Iulian Suica <sup>1</sup>, Elena Uyy <sup>1</sup>, Luminita Ivan <sup>1</sup>, Aurel Cerveanu-Hogas <sup>1</sup>, Razvan Gheorghita Mares <sup>2</sup>, Maya Simionescu <sup>1</sup>, Alexandru Schiopu <sup>2,3</sup> and Felicia Antohe <sup>1,\*</sup>

<sup>1</sup> Department of Proteomics, Institute of Cellular Biology and Pathology "N. Simionescu" of the Romanian Academy, 050568 Bucharest, Romania; raluca.haraba@icbp.ro (R.M.B.); viorel.suica@icbp.ro (V.-I.S.); elena.uyy@icbp.ro (E.U.); luminita.radulescu@icbp.ro (L.I.); aurel.cerveanu-hogas@icbp.ro (A.C.-H.); maya.simionescu@icbp.ro (M.S.)

<sup>2</sup> Department of Pathophysiology, University of Medicine, Pharmacy, Sciences and Technology of Targu Mures, 540142 Targu Mures, Romania; razvan.mares@umfst.ro (R.G.M.); alexandru.schiopu@med.lu.se (A.S.)

<sup>3</sup> Department of Clinical Sciences Malmö, Lund University, 21428 Malmö, Sweden

\* Correspondence: felicia.antophe@icbp.ro; Tel.: +40-213-192-737

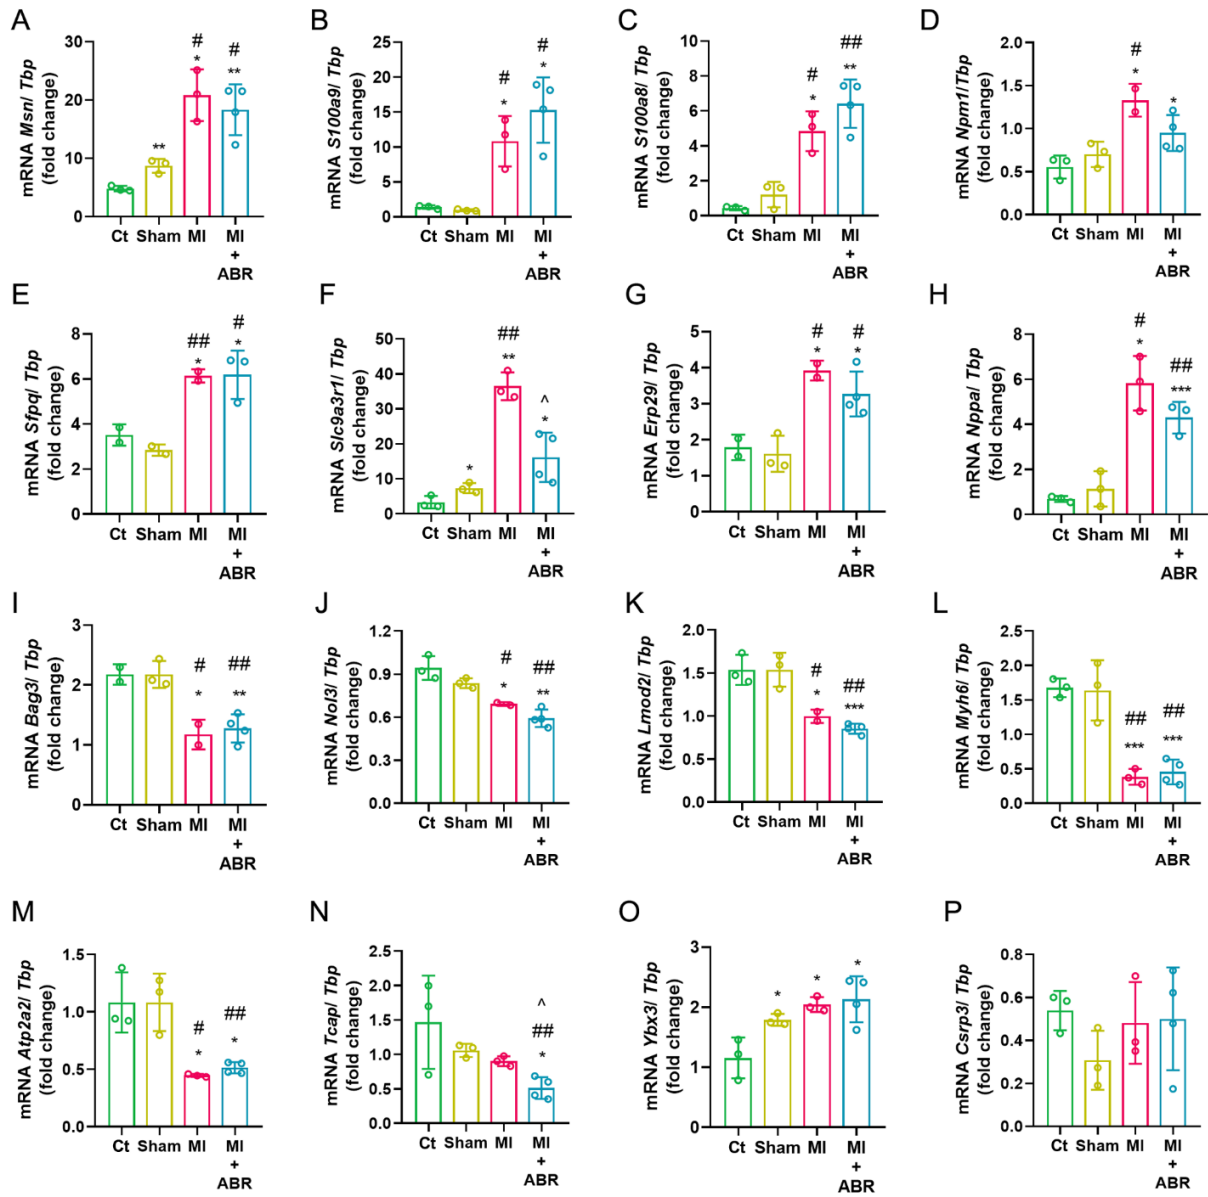

**Figure S1.** Gene expression profile of the identified differentially expressed proteins (DEPs) at 3 days post-MI mRNA expression levels of *Msn*, *S100a9*, *S100a8*, *Npm1*, *Sfpq*, *Slc9a3r1*, *Erp29*, *Nppa*, *Bag3*, *Nol3*, *Lmod2*, *Myh6*, *Atp2a2*, *Tcap*, *Ybx3* and *Csrp3* in the left ventricle of control Ct, Sham, MI and MI+ABR groups were quantified by real-time PCR, using *Tbp* as internal control (A–P). Data are presented as mean  $\pm$  SD;  $p^* < 0.05$ ,  $p^{**} < 0.01$ ,  $p^{***} < 0.001$  vs. Ct;  $p^\# < 0.05$ ,  $p^{##} < 0.01$  vs. Sham;  $p^\wedge < 0.05$  vs. MI;  $p$ -values were calculated using Student's t test.

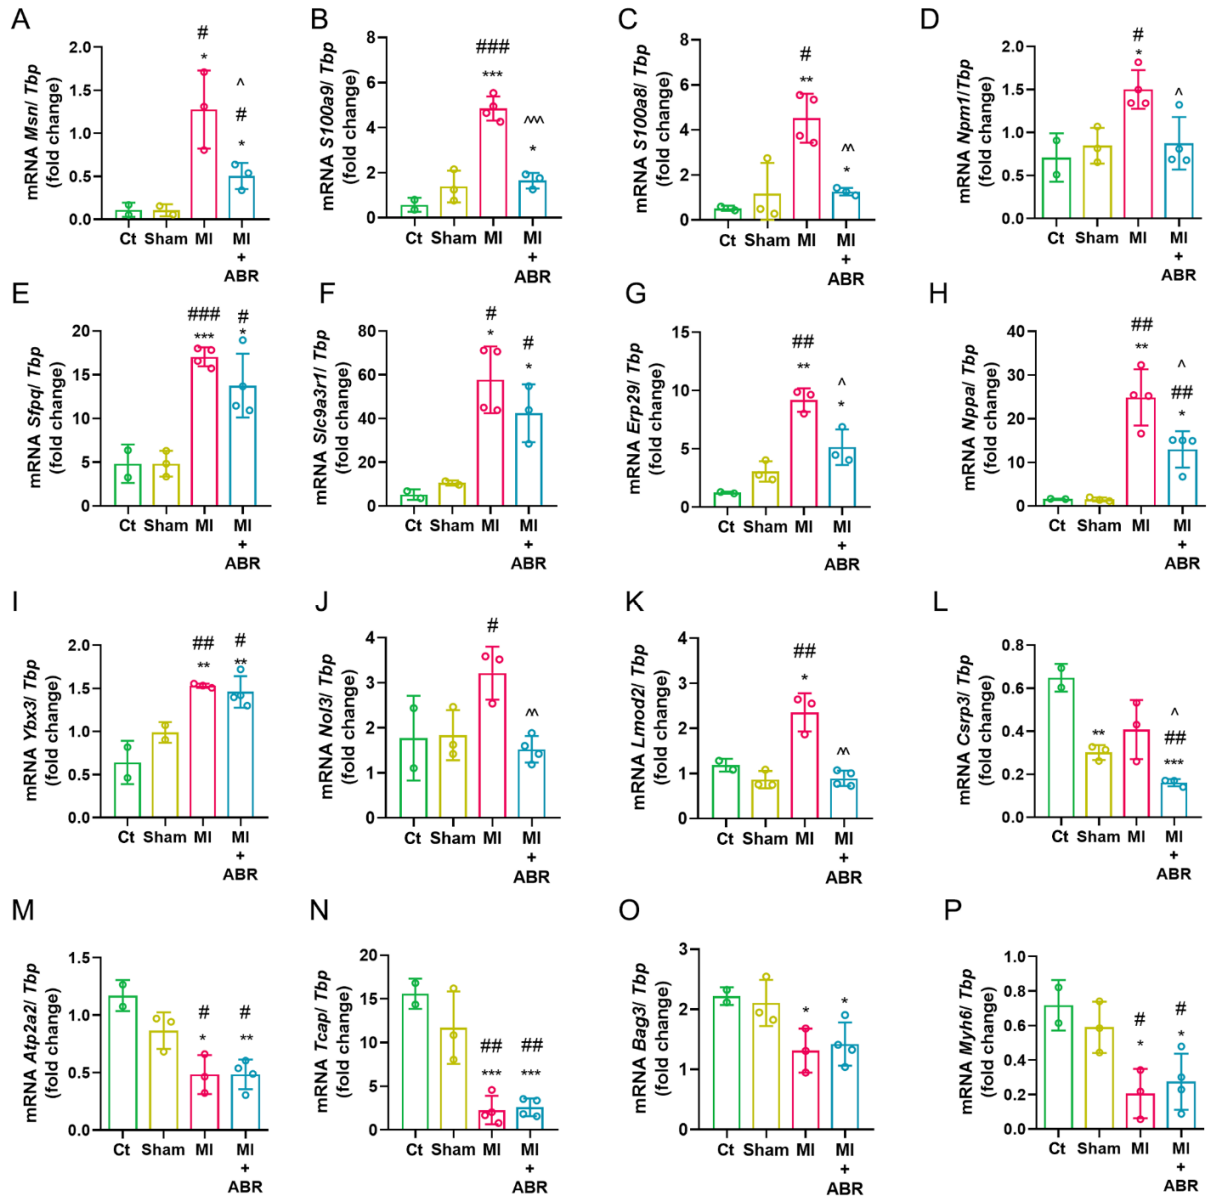

**Figure S2.** Gene expression profile of the identified DEPs at 7 days post-MI mRNA expression levels of *Msn*, *S100a9*, *S100a8*, *Npm1*, *Sfpq*, *Slc9a3r1*, *Erp29*, *Nppa*, *Ybx3*, *Nol3*, *Lmod2*, *Myh6*, *Atp2a2*, *Tcap*, *Bag3* and *Csrp3* in the LV of control Ct, Sham, MI and MI+ABR groups were quantified by real-time PCR, using *Tbp* as internal control (A–P). Data are presented as mean  $\pm$  SD;  $p^* < 0.05$ ,  $p^{**} < 0.01$ ,  $p^{***} < 0.001$  vs Ct;  $p^\# < 0.05$ ,  $p^{\#\#} < 0.01$  vs. Sham;  $p^\wedge < 0.05$ ,  $p^{\wedge\wedge} < 0.01$ ,  $p^{\wedge\wedge\wedge} < 0.001$  vs MI;  $p$ -values were calculated using Student's t test.
